# Supplementary material for: Structural motifs in salts of sulfathiazole: implications for design of salt forms in pharmaceuticals APIs
Source: Royal Society of Chemistry journal article supplement (doi:10.1039/c8ce00606g), 2018-01-01
Supplement: c8ce00606g1.pdf [file c8ce00606g1.pdf]

## Supporting Information for Structural Motifs in Salts of Sulfathiazole: Implications for Design of Salt Forms in Pharmaceuticals APIs.

Table S1. Crystal data and structure refinement for **I**, **II**, **III**, **V**, **VI**.

| Identification code                              | <b>I</b>                                                                                   | <b>II</b>                                                                                    | <b>III</b>                                                                               |
|--------------------------------------------------|--------------------------------------------------------------------------------------------|----------------------------------------------------------------------------------------------|------------------------------------------------------------------------------------------|
| Empirical formula                                | C <sub>18</sub> H <sub>21</sub> N <sub>9</sub> O <sub>13</sub> S <sub>4</sub>              | C <sub>9</sub> H <sub>10</sub> B F <sub>4</sub> N <sub>3</sub> O <sub>2</sub> S <sub>2</sub> | C <sub>18</sub> H <sub>22</sub> N <sub>6</sub> O <sub>9</sub> S <sub>5</sub>             |
| Formula weight                                   | 699.68                                                                                     | 343.13                                                                                       | 626.71                                                                                   |
| Temperature (K)                                  | 173(3)                                                                                     | 173(2)                                                                                       | 173(2)                                                                                   |
| Wavelength (Å)                                   | 0.71073                                                                                    | 0.71073                                                                                      | 0.71073                                                                                  |
| Crystal system                                   | Monoclinic                                                                                 | Monoclinic                                                                                   | Monoclinic                                                                               |
| Space group                                      | P2(1)/n                                                                                    | P2(1)/c                                                                                      | C2/c                                                                                     |
| Unit cell dimensions (Å, °)                      | a = 14.9484(4)<br>b = 8.2585(2)<br>c = 22.9621(6)<br>α = 90<br>β = 100.8180(10)<br>γ = 90° | a = 8.0557(2)<br>b = 9.9422(3)<br>c = 17.2090(5)<br>α = 90<br>β = 90.5700(10)<br>γ = 90      | a = 17.4737(9)<br>b = 11.6240(5)<br>c = 11.7557(5)<br>α = 90<br>β = 90.072 (2)<br>γ = 90 |
| Volume (Å <sup>3</sup> )                         | 2784.32 (12) Å <sup>3</sup>                                                                | 1378.22(7)                                                                                   | 2387.8 (2)                                                                               |
| Z                                                | 4                                                                                          | 4                                                                                            | 4                                                                                        |
| Density (calculated) (Mg/m <sup>3</sup> )        | 1.669                                                                                      | 1.654                                                                                        | 1.743                                                                                    |
| Absorption coefficient (mm <sup>-1</sup> )       | 0.42                                                                                       | 0.438                                                                                        | 0.551                                                                                    |
| Theta range for data collection (°)              | 1.79 to 30.07                                                                              | 2.53 to 30.06                                                                                | 2.33 to 30.23                                                                            |
| Index ranges                                     | -21 ≤ h ≤ 21<br>-11 ≤ k ≤ 11<br>-30 ≤ l ≤ 31                                               | -11 ≤ h ≤ 11<br>-13 ≤ k ≤ 13<br>-22 ≤ l ≤ 24                                                 | -24 ≤ h ≤ 24<br>-16 ≤ k ≤ 16<br>-16 ≤ l ≤ 15                                             |
| Reflections collected                            | 67503                                                                                      | 36555                                                                                        | 29335                                                                                    |
| Independent reflections                          | 8100 [R(int) = 0.046]                                                                      | 4023 [R(int) = 0.0309]                                                                       | 3526 [R(int) = 0.053]                                                                    |
| Refinement method                                | Full-matrix least-squares on F <sup>2</sup>                                                | Full-matrix least-squares on F <sup>2</sup>                                                  | Full-matrix least-squares on F <sup>2</sup>                                              |
| Data / restraints / parameters                   | 8100 / 0 / 565                                                                             | 4023 / 0 / 206                                                                               | 3526 / 0 / 238                                                                           |
| Goodness-of-fit on F <sup>2</sup>                | 1.026                                                                                      | 1.096                                                                                        | 1.055                                                                                    |
| Final R indices [I > 2σ(I)]                      | R1 = 0.039, wR2 = 0.0897                                                                   | R1 = 0.0369, wR2 = 0.0963                                                                    | R1 = 0.0504, wR2 = 0.0961                                                                |
| R indices (all data)                             | R1 = 0.0638, wR2 = 0.1022                                                                  | R1 = 0.0422, wR2 = 0.1008                                                                    | R1 = 0.0922, wR2 = 0.1134                                                                |
| Largest diff. peak and hole (e.Å <sup>-3</sup> ) | 0.415 and -0.392                                                                           | 0.556 and -0.448                                                                             | 0.487 and -0.548                                                                         |

| Identification code                              | V                                                                            | VI                                                                                                                              |
|--------------------------------------------------|------------------------------------------------------------------------------|---------------------------------------------------------------------------------------------------------------------------------|
| Empirical formula                                | C <sub>15</sub> H <sub>15</sub> N <sub>3</sub> O <sub>5</sub> S <sub>3</sub> | C <sub>22</sub> H <sub>27</sub> N <sub>3</sub> O <sub>6</sub> S <sub>3</sub>                                                    |
| Formula weight                                   | 413.48                                                                       | 525.64                                                                                                                          |
| Temperature (K)                                  | 173(3)                                                                       | 173(2)                                                                                                                          |
| Wavelength (Å)                                   | 0.71073                                                                      | 0.71073                                                                                                                         |
| Crystal system                                   | Orthorhombic                                                                 | Triclinic                                                                                                                       |
| Space group                                      | Pbcn                                                                         | P -1                                                                                                                            |
| Unit cell dimensions (Å, °)                      | a = 28.4964(13)<br>b = 8.1448 (3)<br>c = 15.5302 (7)                         | a = 13.1054(4)<br>b = 13.3838(3)<br>c = 17.8464(4)<br>$\alpha$ = 109.9580(10)<br>$\beta$ = 92.029(2)<br>$\gamma$ = 111.5910(10) |
| Volume (Å <sup>3</sup> )                         | 3604.5(3)                                                                    | 2688.99                                                                                                                         |
| Z                                                | 8                                                                            | 4                                                                                                                               |
| Density (calculated) (Mg/m <sup>3</sup> )        | 1.524                                                                        | 1.298                                                                                                                           |
| Absorption coefficient (mm <sup>-1</sup> )       | 0.444                                                                        | 0.315                                                                                                                           |
| Theta range for data collection (°)              | 2.60 to 20.30                                                                | 2.28 to 26.14                                                                                                                   |
| Index ranges                                     | -37 ≤ h ≤ 36<br>-9 ≤ k ≤ 10<br>-20 ≤ l ≤ 20                                  | -17 ≤ h ≤ 17<br>-17 ≤ k ≤ 18<br>-24 ≤ l ≤ 24                                                                                    |
| Reflections collected                            | 85436                                                                        | 70608                                                                                                                           |
| Independent reflections                          | 4115 [R(int) = 0.116]                                                        | 13884 [R(int) = 0.060]                                                                                                          |
| Refinement method                                | Full-matrix least-squares on F <sup>2</sup>                                  | Full-matrix least-squares on F <sup>2</sup>                                                                                     |
| Data / restraints / parameters                   | 4115 / 0 / 354                                                               | 13884 / 0 / 715                                                                                                                 |
| Goodness-of-fit on F <sup>2</sup>                | 1.102                                                                        | 1.208                                                                                                                           |
| Final R indices [I>2sigma(I)]                    | R1 = 0.0537, wR2 = 0.0998                                                    | R1 = 0.0496, wR2 = 0.1100                                                                                                       |
| R indices (all data)                             | R1 = 0.1032, wR2 = 0.1220                                                    | R1 = 0.0978, wR2 = 0.1382                                                                                                       |
| Largest diff. peak and hole (e.Å <sup>-3</sup> ) | 0.391 and -0.561                                                             | 0.456 and -0.463                                                                                                                |

Table S2. Published Crystal Structures of STZ Co-crystals

| REFCODE              | Co-Former                               |
|----------------------|-----------------------------------------|
| ADEDIX (polymorphic) | pyridine                                |
| BABYIN               | acetonitrile                            |
| BABYOT               | N-formylpiperidine                      |
| FIZFUR               | 4-nitrobenzoic acid                     |
| FURDIF               | Dioxane                                 |
| HADMUU               | 18-crown-6/acetonitrile                 |
| KUFWOZ               | 4-aminobenzamide                        |
| LOFLUP               | Glutaric acid                           |
| SOGSEO               | dimethylformamide                       |
| STHSAM               | sulfanilamide                           |
| SULTHE               | theophylline                            |
| WIYLAT               | 2,4,6-tris(pyridin-2-yl)-1,3,5-triazine |

### Crystal Structure Packing Analysis of CSD Salts

*Systems where STZ acts as a base.*

#### BUWDUT

STZ dimers are formed from  $^+NH...N=$  H-bonds. These are linked into a 2-D sheet in the b-c plane through a collection of  $NH...F$  H-bonds (Figure 1). Sheets then stack in a-direction through weaker ring...ring motifs (Figure 2).

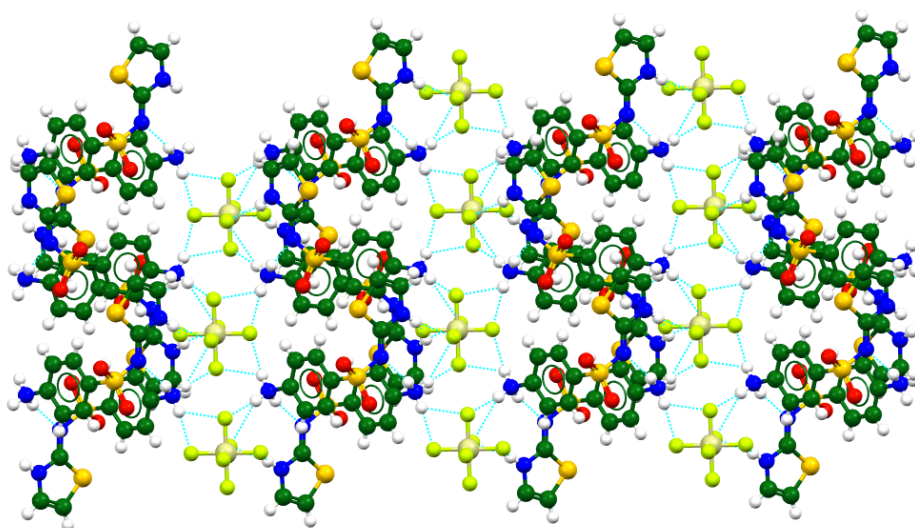

Figure S1. Formation of 2-D sheet in STZ.SiF<sub>6</sub>

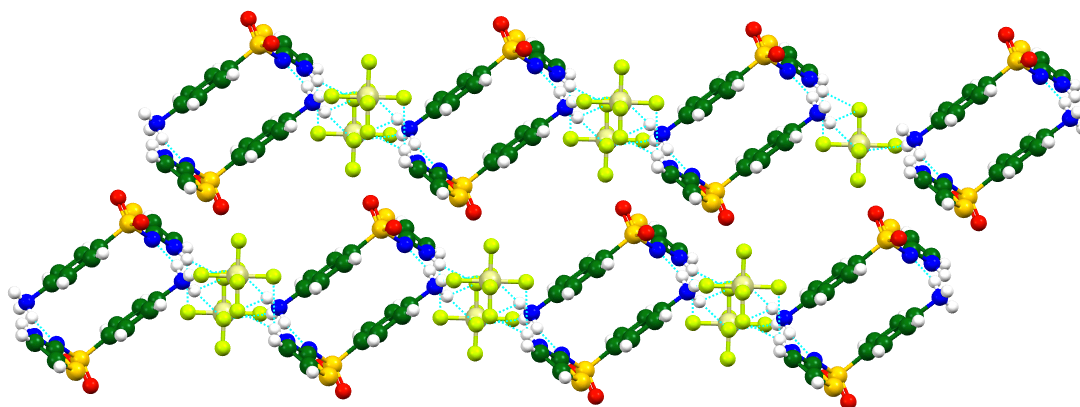

Figure S2. Packing of sheets along a-axis.

### UDAKOA

STZ molecules form a 1-D chain through a  $\text{NH}\cdots\text{O}=\text{S}$  H-bond. These are supported by two  $\text{NH}\cdots\text{O}$  bonds to the water molecules (Figure 3) and an  $\text{OH}\cdots\text{O}=\text{S}$  hydrogen bond then links these chains into a 2-D sheet (Figure 4). The sheets are linked into the final 3-D structure by the  $\text{NO}_3^-$  anions forming an  $\text{OH}\cdots\text{O}$  and  $\text{NH}\cdots\text{O}$  hydrogen bonds (Figure 5).

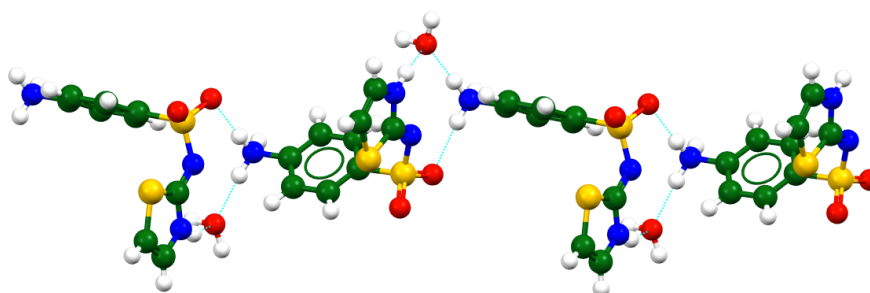

Figure S3. 1-D chain formed between STZ and  $\text{H}_2\text{O}$  in UDAKOA.

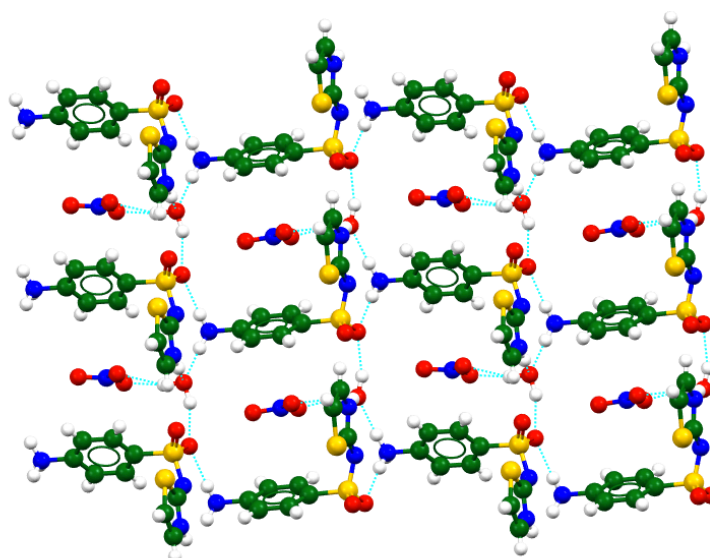

Figure S4. 2-D sheet formed through  $\text{NO}_3^-/\text{H}_2\text{O}$  interactions.

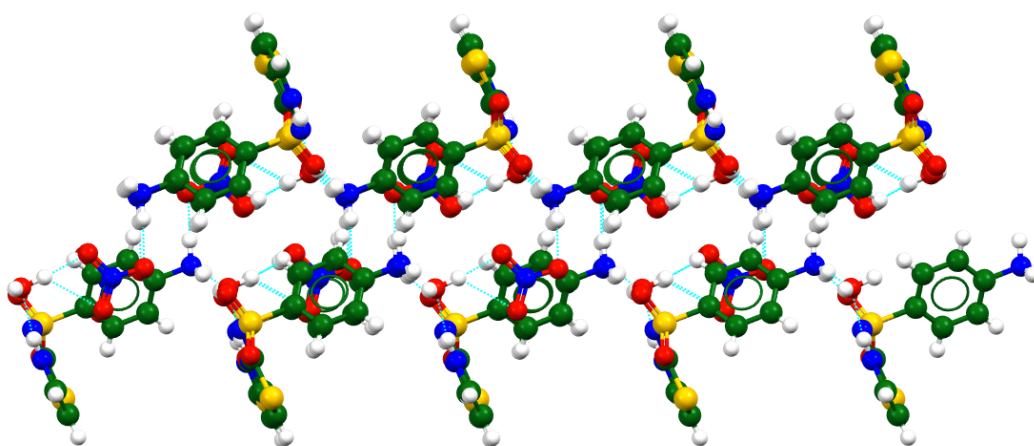

Figure S5. Completion of 3-D structure through packing of 2-D sheet.

### KUFWIT

STZ molecules dimerise through a  $R^2_2(16)$  motif (NH...O=S bond). These dimers then form a 1-D chain through further NH...N and NH...O=S bonds, the carboxylate anion links to the chain through two NH...O bonds (Figure 6). To this the neutral acid H-bonds through an OH...O interaction. These chains then interweave between each other through  $\pi$ ... $\pi$  and CH...O interactions to form final crystal structure (Figure 7).

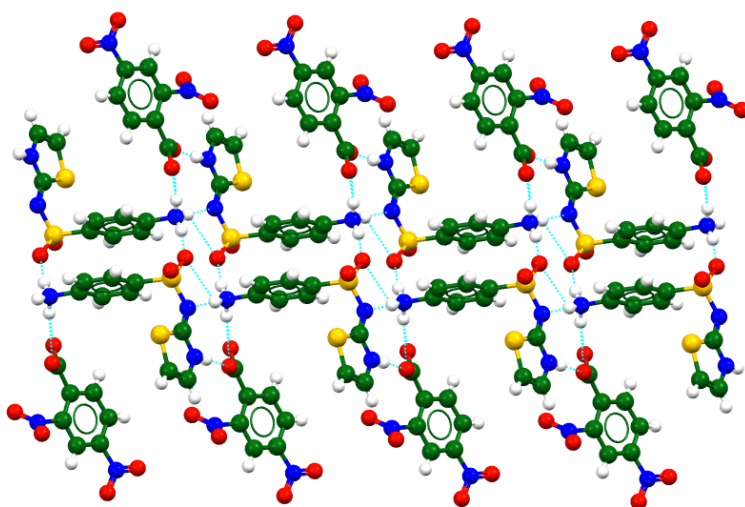

Figure S6. Formation of 1-D ribbon.

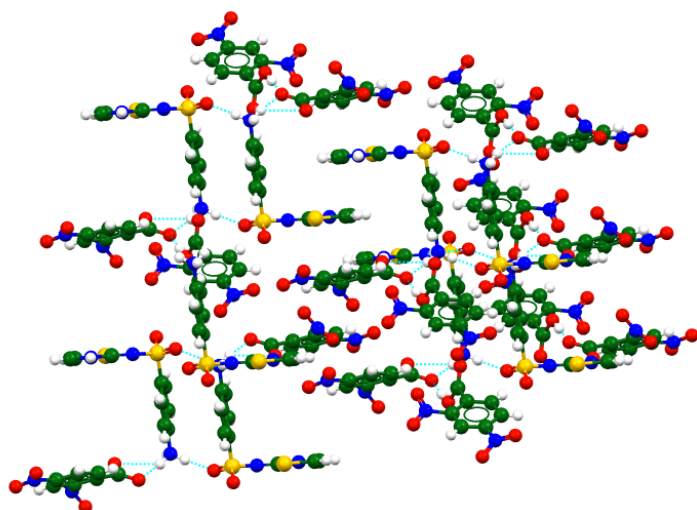

Figure S7. Interlocking of 1-D chains.

## LOFMAW

Polymorphic system.

Form I

1-D ladder form between both components along the a-axis formed by NH...O, OH...O and NH...N H-bonds (Figure 8), which are linked through NH...O bonds to form a 2-D sheet motif (Figure 9), which forming the final 3-D structure through NH...O bonds.

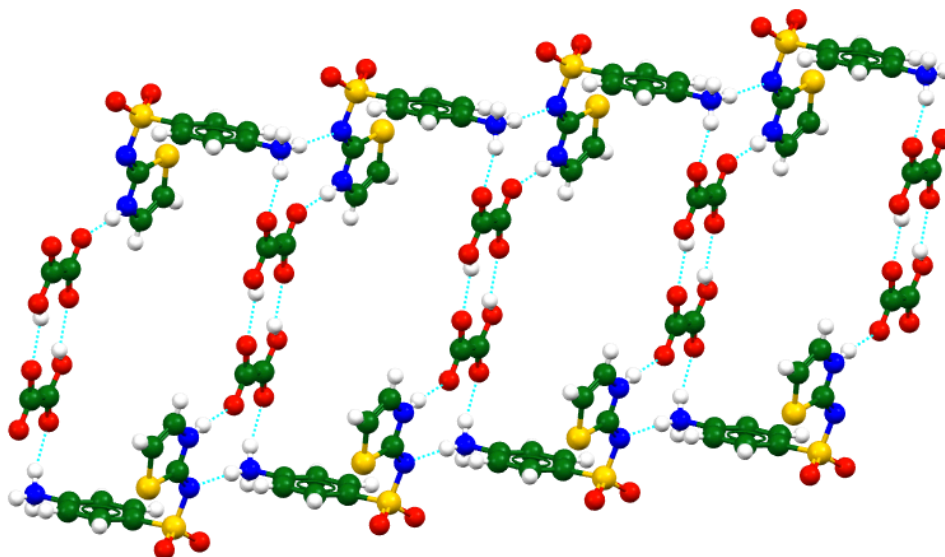

Figure S8. Ladder motif in LOFMAW.

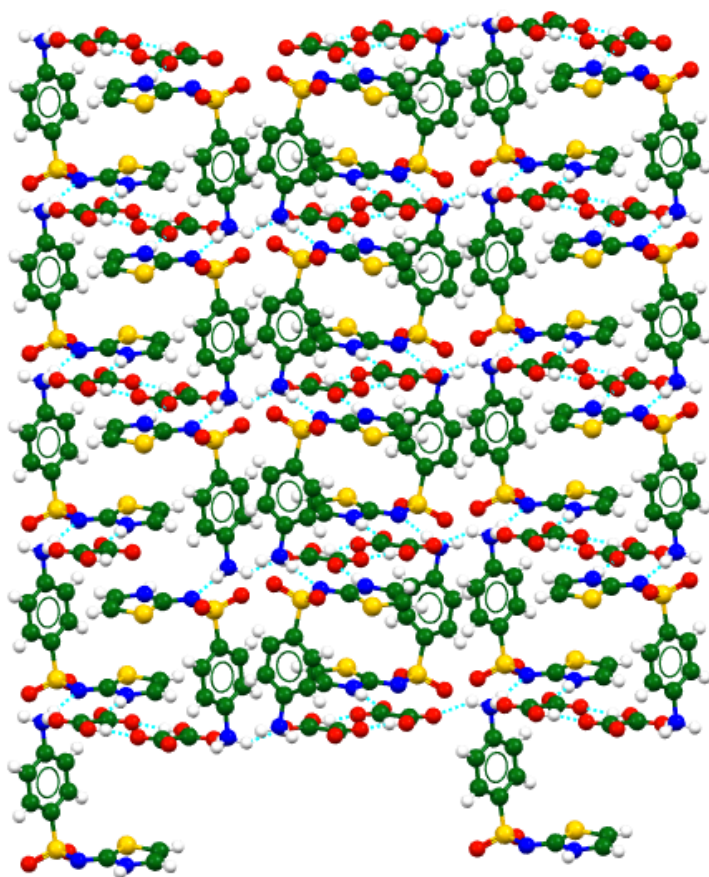

Figure S9. 2-D sheet formed by linking 1-D chains.

#### Form II (LOFMAW01)

1-D chain is formed between STZ and oxalate anions through  $\text{NH}\cdots\text{O}=\text{S}$  and  $\text{NH}\cdots\text{O}$  H-bonds (Figure 10), which are interlinked into a 2-D sheet through oxalate to oxalate hydrogen bonds (Figure 11). 3-D structure is constructed through interweaving of the 2-D motifs held together by weak  $\text{CH}\cdots\text{O}$  bonds (Figure 12).

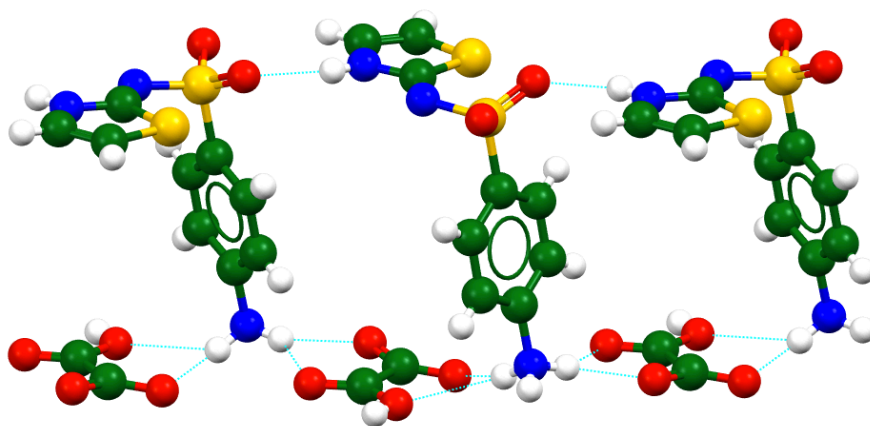

Figure S10. 1-D Chain of STZ...oxalate anions.



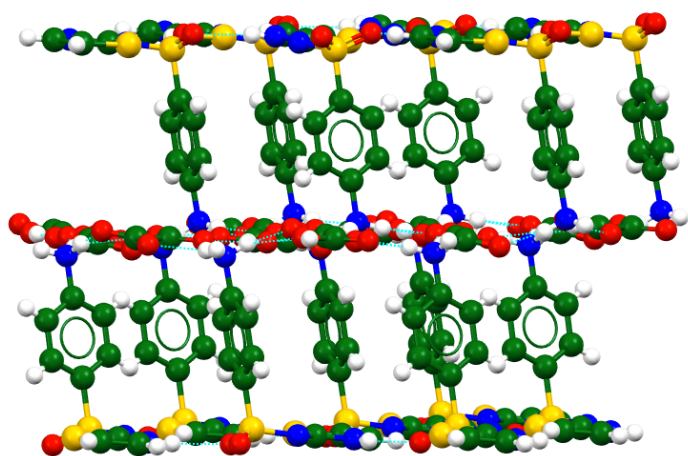

Figure S11. 2-D sheet formed between the 1-D chains.

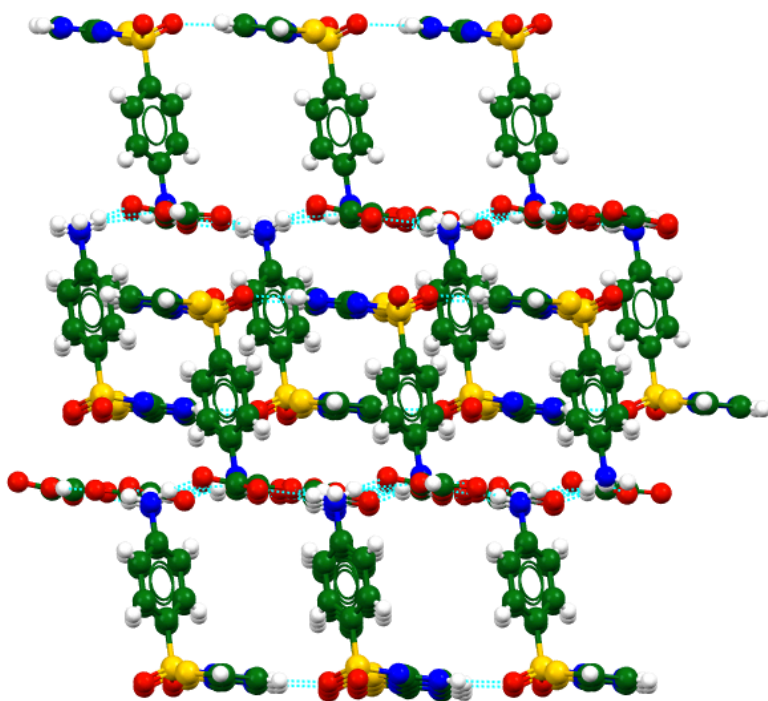

Figure S12. Final 3-D packing through interweaving of 2-D layers.



*Systems where STZ acts as an acid.*

### **BUHMOI**

Components are bound in a pair through  $\text{NH}\cdots\text{N}$   $R^2_2(8)$  H-bond. STZ molecules form a 1-D chain through  $\text{NH}\cdots\text{O}=\text{S}$  bond and chains combine into a 2-D sheet by  $\text{NH}\cdots\text{O}=\text{S}$  interaction (Figure 13). 3-D structure is formed by stacking the sheets along the *a*-axis through weaker  $\text{NH}\cdots\text{S}$  bonds.

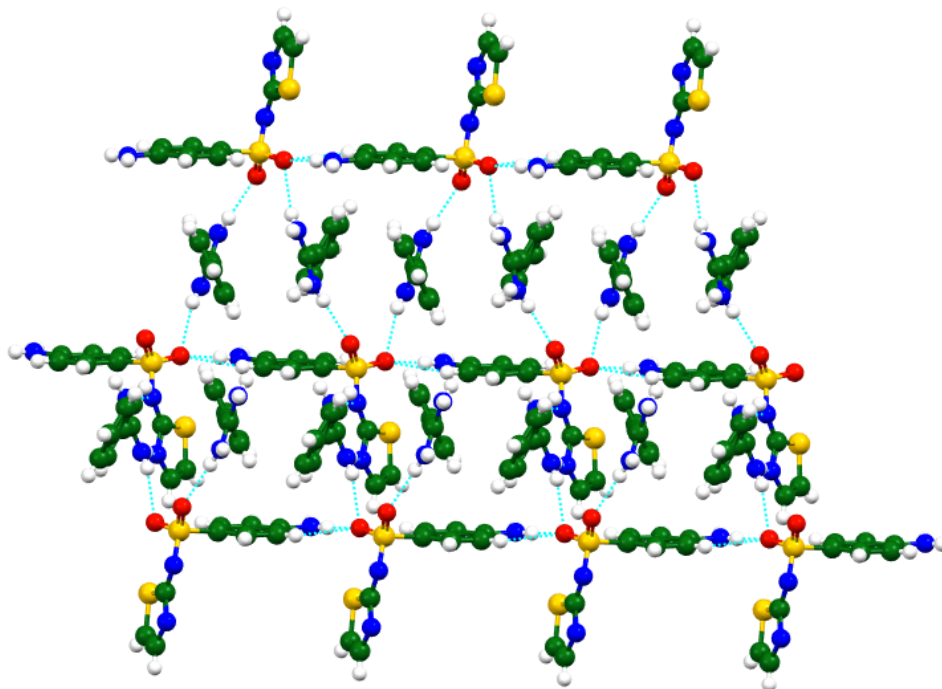

Figure S13. 2-D sheet structure in BUHMOI

### **DOWPUC**

STZ molecules form a 2-D sheet in *ab* plane through  $\text{NH}\cdots\text{O}=\text{S}$  H-bonds (Figure 14). The counterion bonds to the STZ through a  $\text{NH}\cdots\text{N}_{\text{ring}}$  H-bond, weaker  $\text{CH}\cdots\text{N}$  bonds between these molecules links the sheet together to form the final structure (Figure 15).

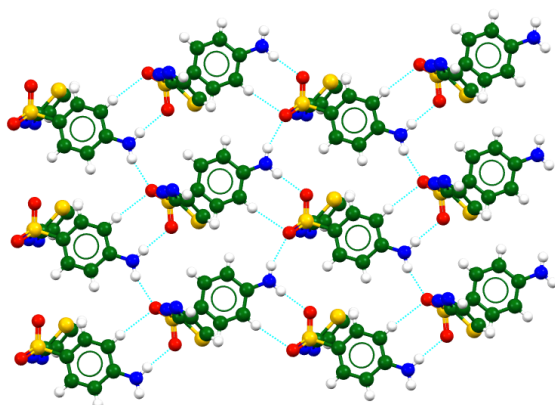

Figure S14. Formation of 2-D sheet in DOWPUC.

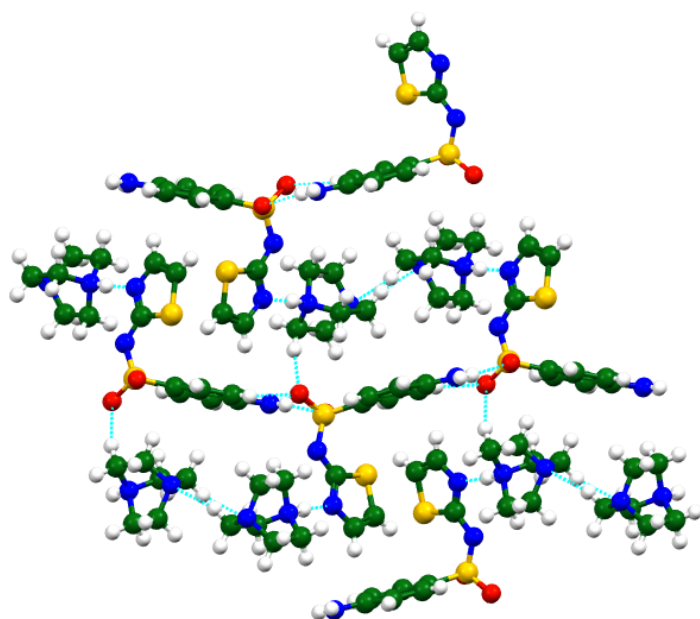

Figure S15. Packing of second molecule into 2-D to form 3-D structure.

#### **DOWQAJ**

Channel clathrate with a 1-D chain of piperazine molecules (along a-axis) within a STZ channel formed by  $\text{NH}\cdots\text{O}=\text{S}$  bonds (Figure 16), which is linked through further  $\text{NH}\cdots\text{O}=\text{S}$  bonds to form 3-D structure.

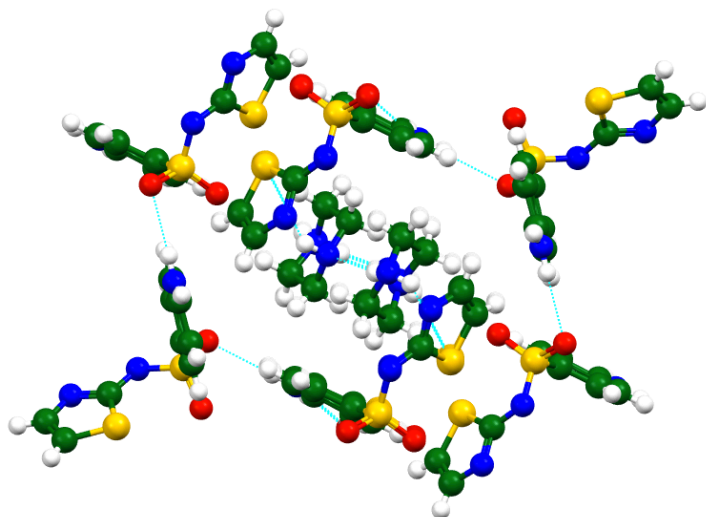

Figure S16. 1-D channel formed from STZ molecules with piperazine inclusion.

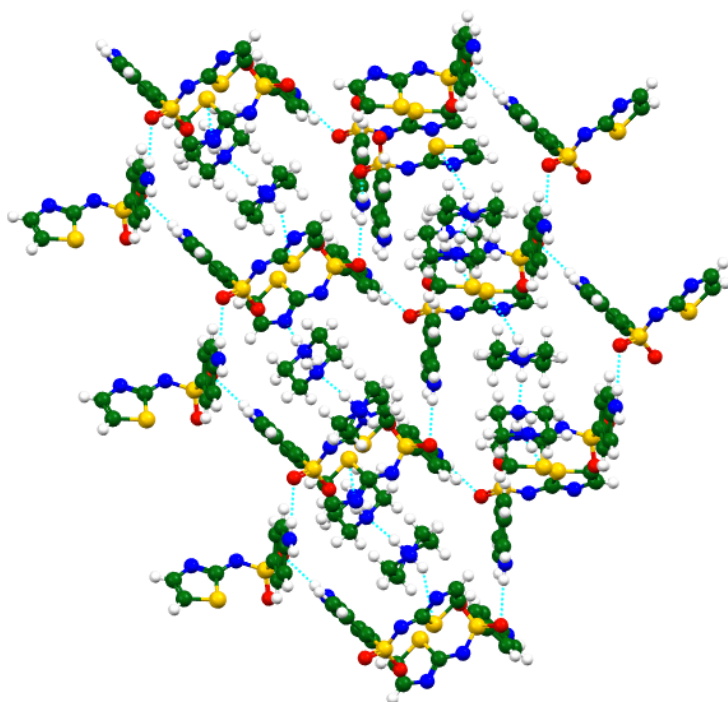

Figure S17. Interlocking channels to form final structure.

### **HSLSTZ**

2-D sheet formed through direct interaction of the two sulfonamides (Figure 18) through a collection of  $\text{NH}\cdots\text{O}=\text{S}$  and  $\text{NH}\cdots\text{N}$  H-bonds. These are linked through a  $\text{NH}\cdots\text{O}=\text{S}$  H-bond forming the final structure (Figure 19).

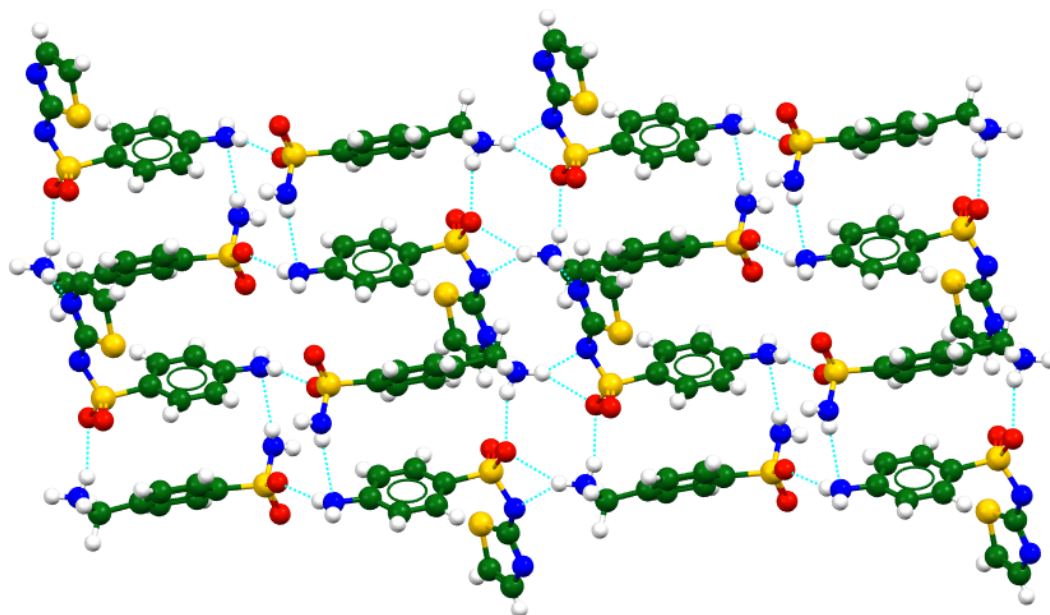

Figure S18. 2-D sheet formed for HSLSTZ

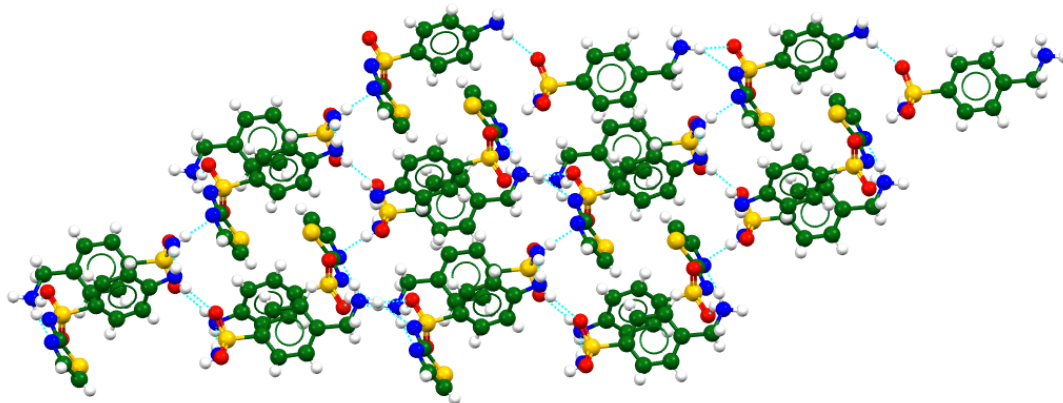

Figure S19. Stacking of 2-D sheets to form 3-D structure.

### OHUWAR

The two components of the salt form a tetramer through a  $R^4_4(18)$  set of  $NH...N$  and  $OH...N$  hydrogen bonds. These are linked into a 1-D ribbon through  $NH...N$  hydrogen bonds (Figure 20), which further forms a 2-D sheet with  $C-H...O=S$  links (Figure 21). Final structure formed by stacking along *a*-axis with further  $CH...O=S$  bonds.

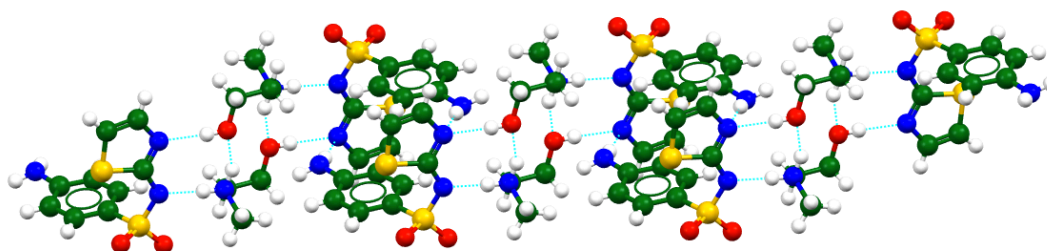

Figure S20. Linking of tetramers into 1-D chain.

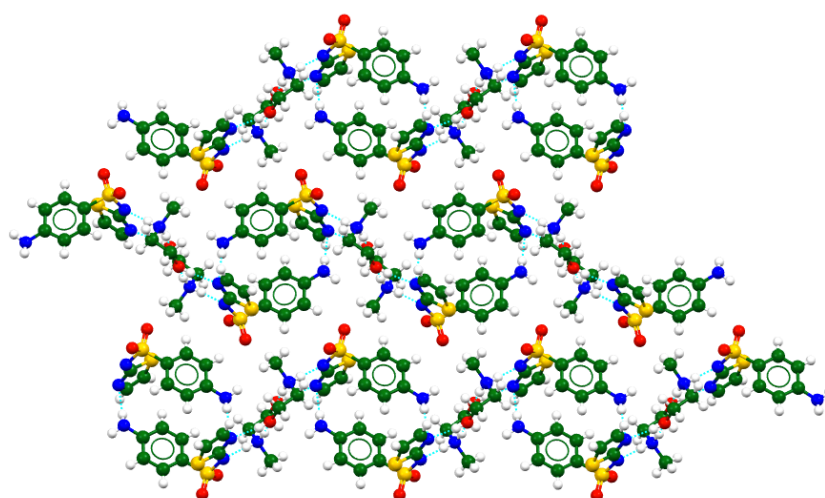

Figure S21. 2-D sheet in *bc* plane.

### OHUWEV

STZ molecules form a 2-D sheet through  $\text{NH}\cdots\text{O}=\text{S}$  bonds (Figure 22), these are linked through pairs of anions with  $\text{OH}\cdots\text{N}/\text{NH}\cdots\text{N}$  hydrogen bonds to form the final structure.

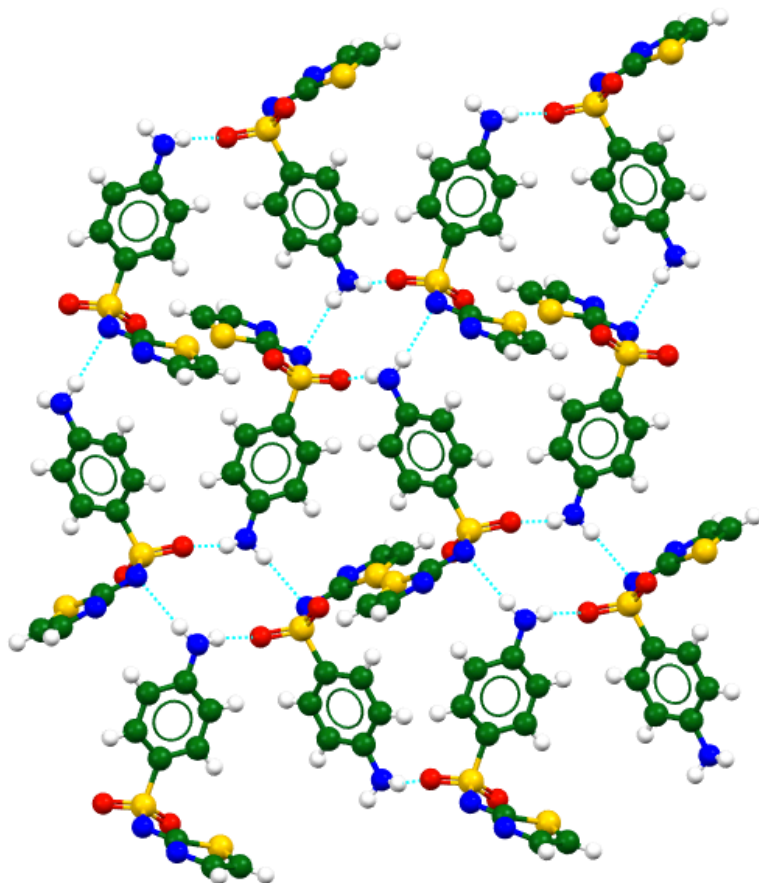

Figure S22. 2-D sheet formed solely from STZ molecules.

### OHUWIZ

STZ molecules form a dimer and are linked together with anion dimers to form a 1-D chain through a range of hydrogen bonds (Figure 23). These chains are linked through  $\text{NH}\cdots\text{O}=\text{S}$  bonds to form a 2-D structure which are stacked in the c-axis with weak  $\text{CH}\cdots\text{O}=\text{S}$  bonds to give the final structure.

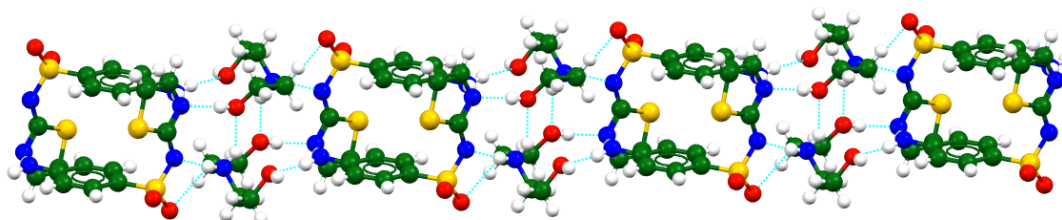

Figure S23. 1-D linked chain of molecules in OHUWIZ



## QEDWAZ

STZ molecules link through  $\text{NH}\cdots\text{O}=\text{S}$  bonds to form a 1-D ribbon, which are linked through dimers of counterion with  $\text{OH}\cdots\text{N}$  bonds to form 2-D sheet (Figure 24). Final structure is formed by stacking held together with  $\text{NH}\cdots\text{O}=\text{S}$  H-bonds.

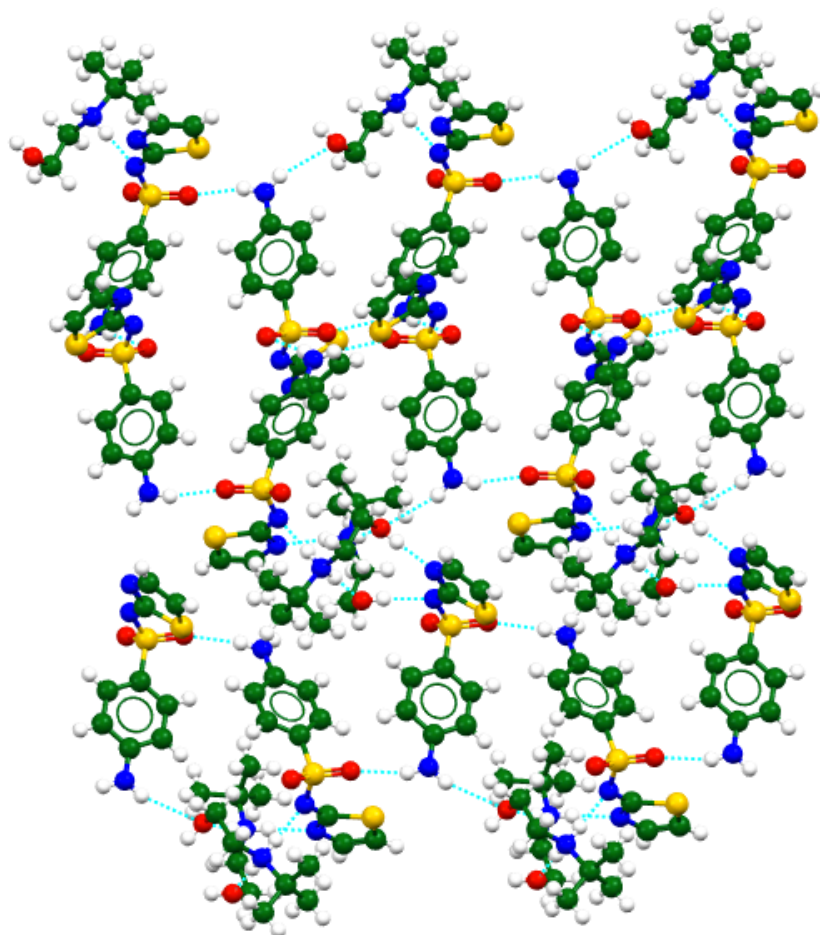

Figure S24. 2-D sheet in QEDWAZ structure.

## XIFPEI01

1-D ribbon is formed through the two components (Figure 25) by a combination of  $\text{NH}\cdots\text{O}=\text{S}$  interactions between both species, a second  $\text{NH}\cdots\text{O}=\text{S}$  H-bond then links these chains into a 2-D structure (Figure 26). Final structure is formed from stacking of these sheets with interweaving of thiazole rings (Figure 27).

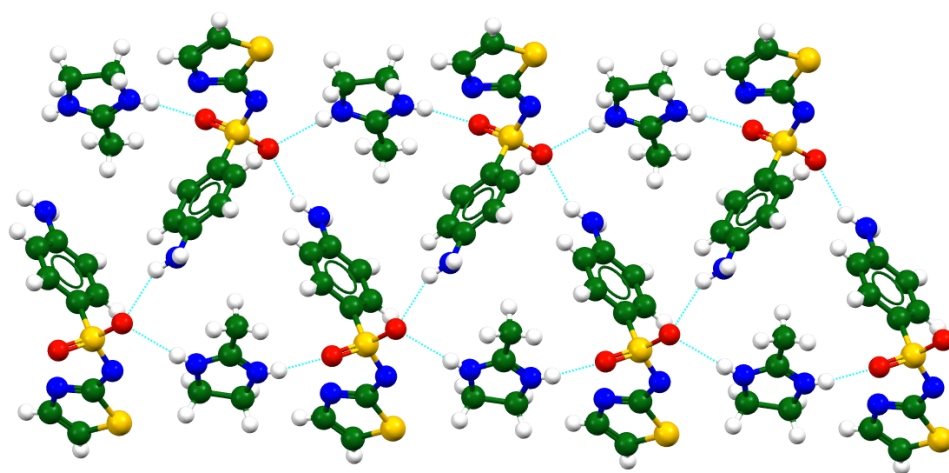

Figure S25. 1-D ribbon in XIFPEI

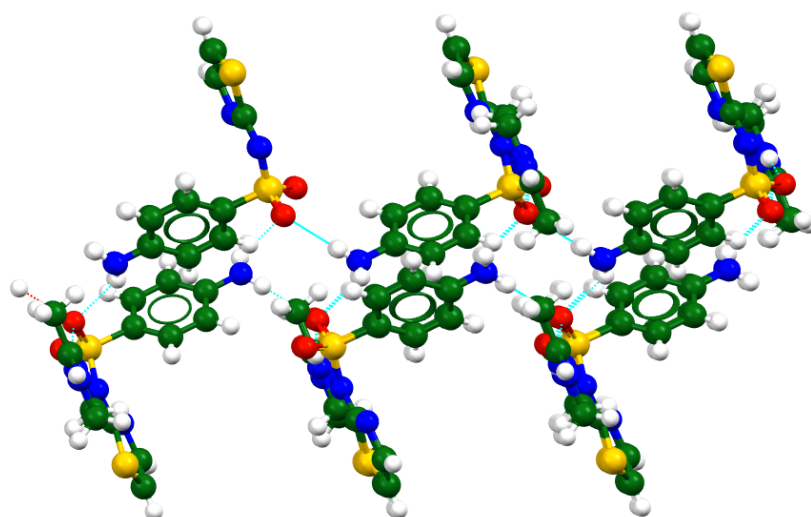

Figure S26. Rotation of Figure 25 chain, then linked through NH...O=S bonds.



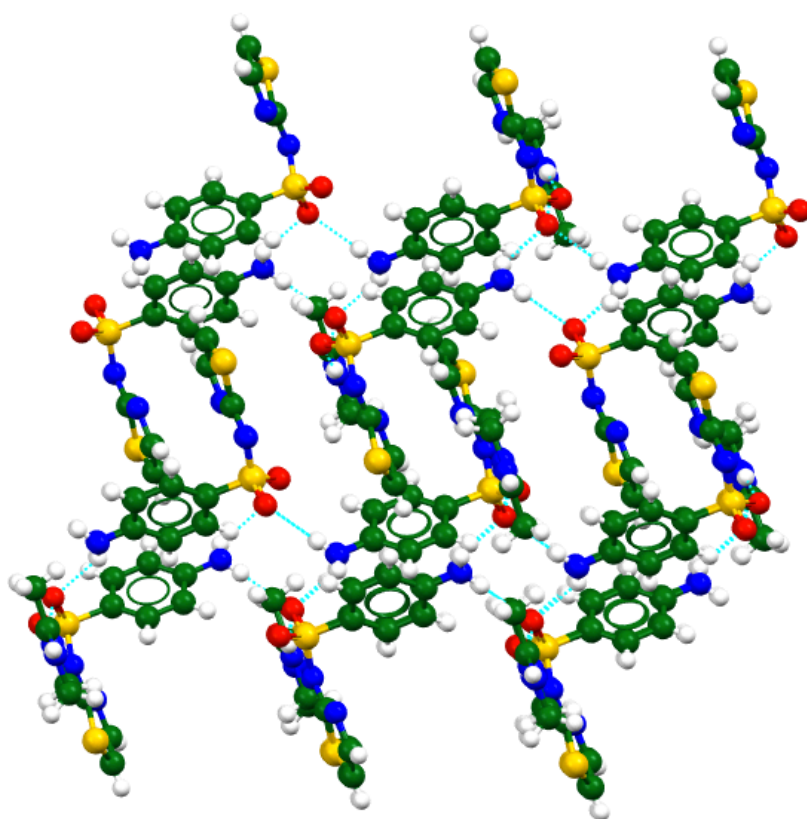

Figure S27. Stacking of 2-D sheets into final structure.

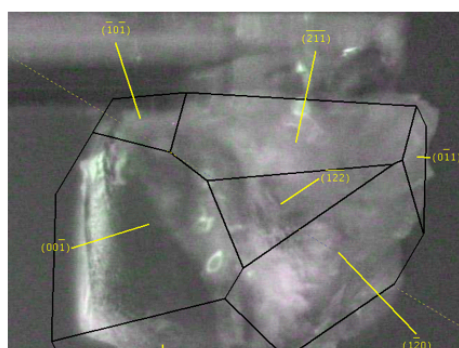

**Salt II (BF<sub>4</sub>)**

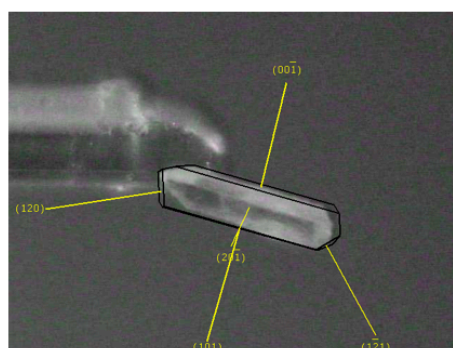

**Salt III (SO<sub>4</sub>)**

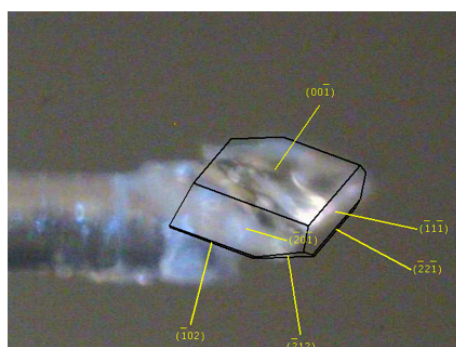

**Salt VI**

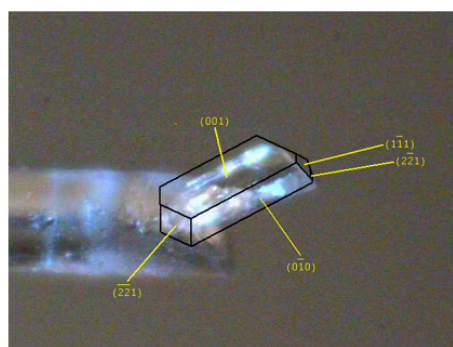

**Salt V**

Figure S28. Morphologies of STZ salts studied.
